# Supplementary material
Source: publisher figshare collection journal article supplement (https://frontiersin.figshare.com/ndownloader/files/34810558)
Supplement: Supplementary file [file 34810558]

## Supplementary Material

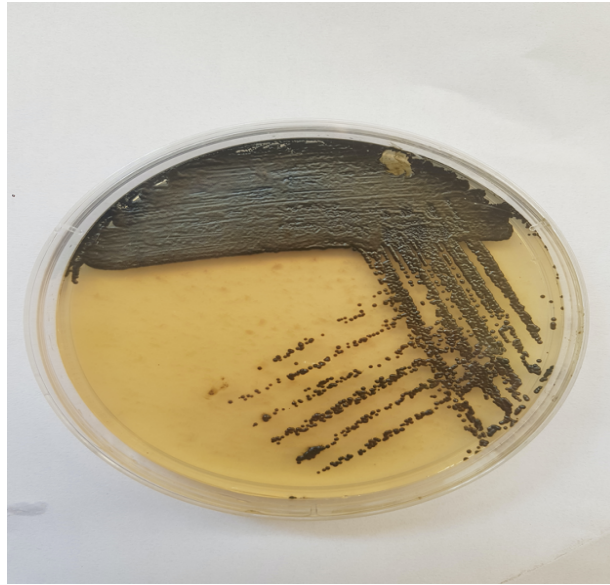

**Figure 1.** *Hortaeta werneckii* AS1 melanized colonies on Sabouraud Dextrose Agar (SDA)

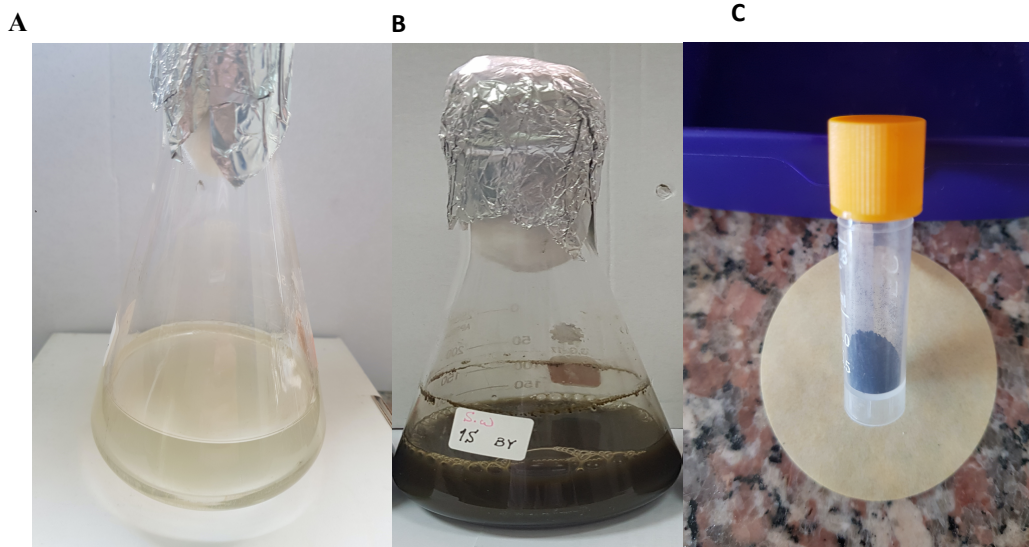

**Figure 2.** (A) Control culture of modified Vogel liquid medium, (B) a grown culture of *Hortaeta werneckii* AS1 in modified Vogel liquid medium prepared with seawater, and (C) extracted melanin pigment from yeast biomass.
